# Supplementary material
Source: publisher figshare collection journal article supplement (https://frontiersin.figshare.com/ndownloader/files/17936054)
Supplement: Supplementary file [file 17936054]

## *Supplementary Material*

### 1 Supplementary Tables

**Supplementary Table 1. Average synaptic parameters in the evolved absolute disparity networks to (A) far and (B) near disparities.** After 2500 evolutionary generations, the three evolvable parameters at each connection were recorded for the best performing networks. The mean and SEM parameters across all populations are shown. Connections are labeled as in Figure 3 and 4.

(A) Absolute-far

| Parameter | Connection          |                      |
|-----------|---------------------|----------------------|
|           | 2                   | 4                    |
| A         | $1.1958 \pm 0.1014$ | $-0.7872 \pm 0.1182$ |
| B         | $1.1092 \pm 0.1836$ | $0.0260 \pm 0.0765$  |
| C         | $1.2276 \pm 0.4611$ | $0.3077 \pm 0.5908$  |

(B) Absolute-near

| Parameter | Connection           |                     |
|-----------|----------------------|---------------------|
|           | 2                    | 4                   |
| A         | $-0.8051 \pm 0.1425$ | $1.2108 \pm 0.1165$ |
| B         | $0.0149 \pm 0.0371$  | $1.1438 \pm 0.1703$ |
| C         | $0.3966 \pm 0.7219$  | $1.3304 \pm 0.4823$ |

**Supplementary Table 2. Average synaptic parameters in the successfully evolved relative disparity networks to (A) relative-far and (B) relative-near disparities.** After 2500 evolutionary generations, the three evolvable parameters at each connection were recorded for the best performing networks. The mean parameters and SEM across all populations are shown. Connections are labeled as in Figure 5.

(A) Relative-far

| Parameter | Connection          |                      |                      |                     |
|-----------|---------------------|----------------------|----------------------|---------------------|
|           | Target-Contra       | Target-Ipsi          | Other-Contra         | Other-Ipsi          |
| A         | 1.6707 $\pm$ 0.7488 | -0.9937 $\pm$ 0.1960 | -0.9166 $\pm$ 0.5332 | 1.3717 $\pm$ 0.4836 |
| B         | 3.4959 $\pm$ 0.6754 | 4.9397 $\pm$ 1.9644  | 4.2618 $\pm$ 1.4912  | 3.8706 $\pm$ 1.7863 |
| C         | 1.0330 $\pm$ 0.8003 | 0.2803 $\pm$ 0.6589  | 0.3982 $\pm$ 0.6049  | 0.7094 $\pm$ 0.6377 |

(B) Relative-near

| Parameter | Connection           |                     |                     |                      |
|-----------|----------------------|---------------------|---------------------|----------------------|
|           | Target-Contra        | Target-Ipsi         | Other-Contra        | Other-Ipsi           |
| A         | -1.1714 $\pm$ 0.3448 | 1.8087 $\pm$ 0.7681 | 1.6719 $\pm$ 0.5670 | -1.0140 $\pm$ 0.5178 |
| B         | 4.4093 $\pm$ 1.5122  | 3.0352 $\pm$ 0.7292 | 3.2267 $\pm$ 0.7113 | 3.7939 $\pm$ 1.1969  |
| C         | 0.3703 $\pm$ 0.7592  | 0.9226 $\pm$ 0.6784 | 0.9334 $\pm$ 0.6316 | 0.3627 $\pm$ 0.6327  |
